# Supplementary material
Source: PubMed Central journal article supplement (PMC3630810)
Supplement: hdy201296x3.pdf [file hdy201296x3.pdf]

686 Supplementary Table 1 Hypothesized genotypes (phenotypes) at sexual function loci for parents and progeny for *Fragaria × ananassa*  
687 subsp. *cuneifolia* map crosses. In both crosses the male function has two alleles: *A* – dominant male sterility, *a* – recessive male  
688 fertility; whereas the female function locus houses two alleles: *G* – dominant female fertility, *g*– recessive female sterility. A) Sex  
689 function alleles segregate from the maternal parent (MP12), while the paternal parent is homozygous recessive for both sex function  
690 loci (that is, on LG VI.A. B) Male function segregates only in the maternal parent (WREN7), while the female function segregates in  
691 both maternal (WREN7) and paternal (MP10) parents (that is, on homeologous LG VI.B) and at two separate loci. At the second  
692 locus, the paternal parent contributes an allele (-) that reduces fruit set relative to wild type (+), as inferred from QTL. In addition a  
693 third locus is hypothesized to explain the negative effect of homoeo-QTL from the paternal parent (MP10). Gametes are represented  
694 with and without recombination between the sexual function loci. Recombination in the maternal and paternal parents results in  
695 gametes with allelic combinations that differ from the parental genotype in both crosses, except (WREN2) which is homozygous  
696 recessive for both sex loci.

697 1A. MP12×WREN2

698

| Parental Genotypes    |                       | Gametes (non-recombinant) |           | Progeny fertility |      | Progeny phenotype | Gametes (recombinant) |           | Progeny fertility |      | Progeny phenotype |
|-----------------------|-----------------------|---------------------------|-----------|-------------------|------|-------------------|-----------------------|-----------|-------------------|------|-------------------|
| Maternal              | Paternal              | Maternal                  | Paternal  | Female            | Male |                   | Maternal              | Paternal  | Female            | Male |                   |
| <i>AG</i>   <i>ag</i> | <i>ag</i>   <i>ag</i> | <i>AG</i>                 | <i>ag</i> | yes               | no   | Female            | <i>Ag</i>             | <i>ag</i> | yes               | no   | Female*           |
|                       |                       | <i>ag</i>                 | <i>ag</i> | no                | yes  | Male              | <i>aG</i>             | <i>ag</i> | no                | yes  | Hermaphrodite*    |

699

700 1B. WREN7×MP10

|                       |                       |           |           |     |     |                |           |           |     |     |                      |
|-----------------------|-----------------------|-----------|-----------|-----|-----|----------------|-----------|-----------|-----|-----|----------------------|
| <i>AG</i>   <i>ag</i> | <i>aG</i>   <i>ag</i> | <i>AG</i> | <i>aG</i> | yes | no  | <b>Female</b>  | <i>Ag</i> | <i>aG</i> | yes | no  | Female*              |
| +                     | +                     | +         | +         |     |     |                | +         | -         |     |     |                      |
|                       |                       | <i>ag</i> | <i>ag</i> | no  | yes | Male           | <i>aG</i> | <i>ag</i> | no  | yes | <b>Hermaphrodite</b> |
|                       |                       | +         | -         |     |     |                | +         | +         |     |     |                      |
|                       |                       | <i>AG</i> | <i>ag</i> | yes | no  | Female         | <i>Ag</i> | <i>ag</i> | yes | no  | Female*              |
|                       |                       | +         | -         |     |     |                | +         | +         |     |     |                      |
|                       |                       | <i>ag</i> | <i>aG</i> | no  | yes | Hermaphrodite* | <i>aG</i> | <i>aG</i> | no  | yes | Hermaphrodite*       |
|                       |                       | +         | +         |     |     |                | +         | -         |     |     |                      |

701 Progeny phenotype highlighted in bold indicate high fruiting phenotypes while those in asterisks indicates a low fruiting phenotypes.
