# Supplementary material
Source: PubMed Central journal article supplement (PMC3630810)

# Homeologous Group VI

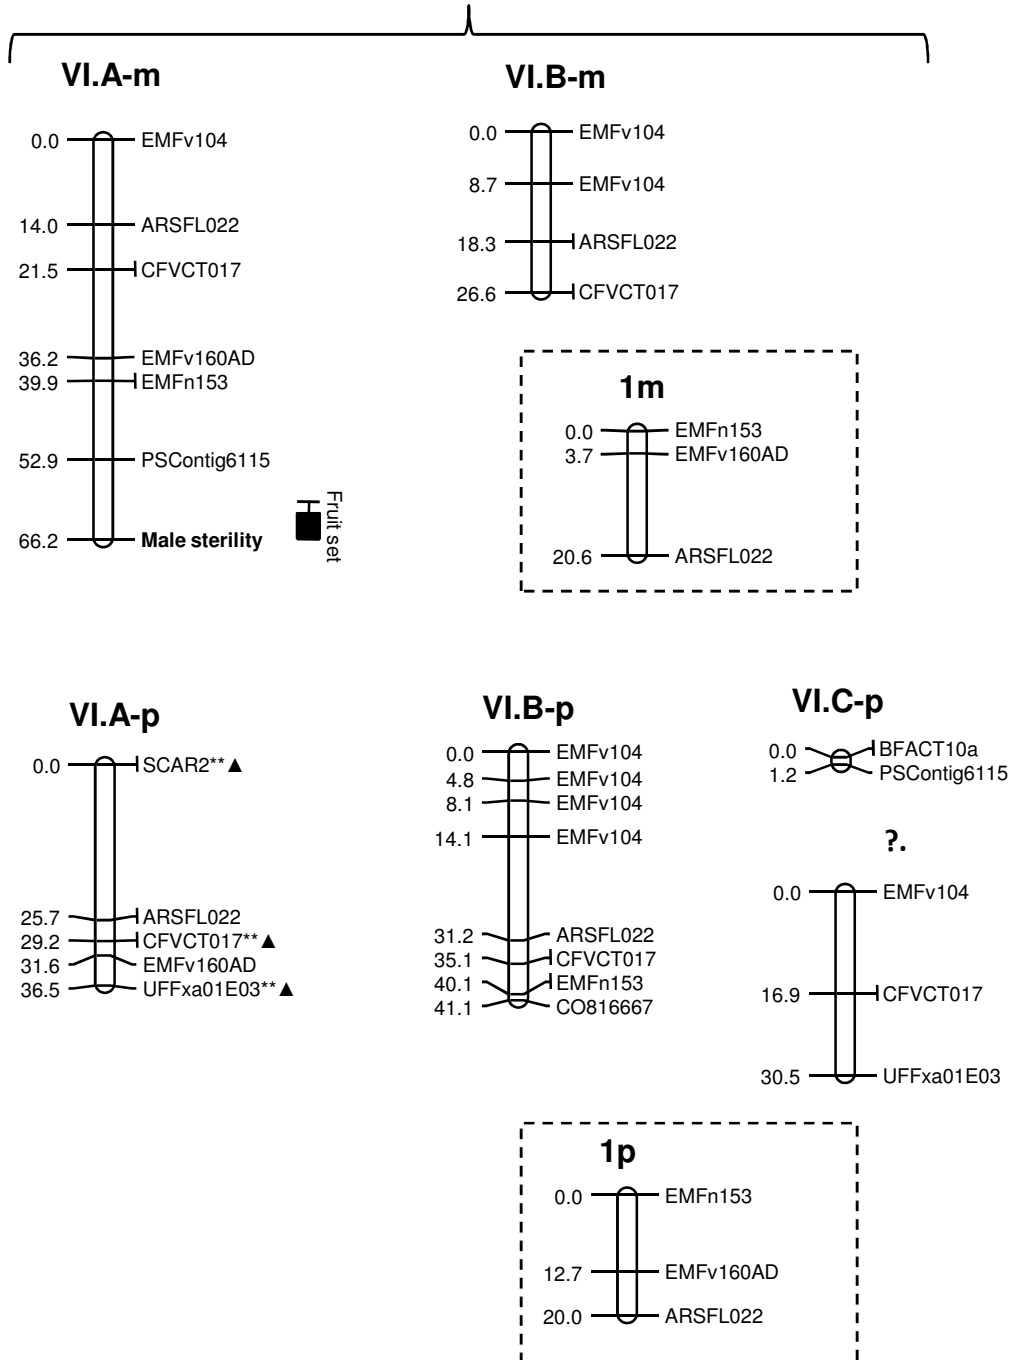

Supplementary Figure 1.

# Homeologous Group VI

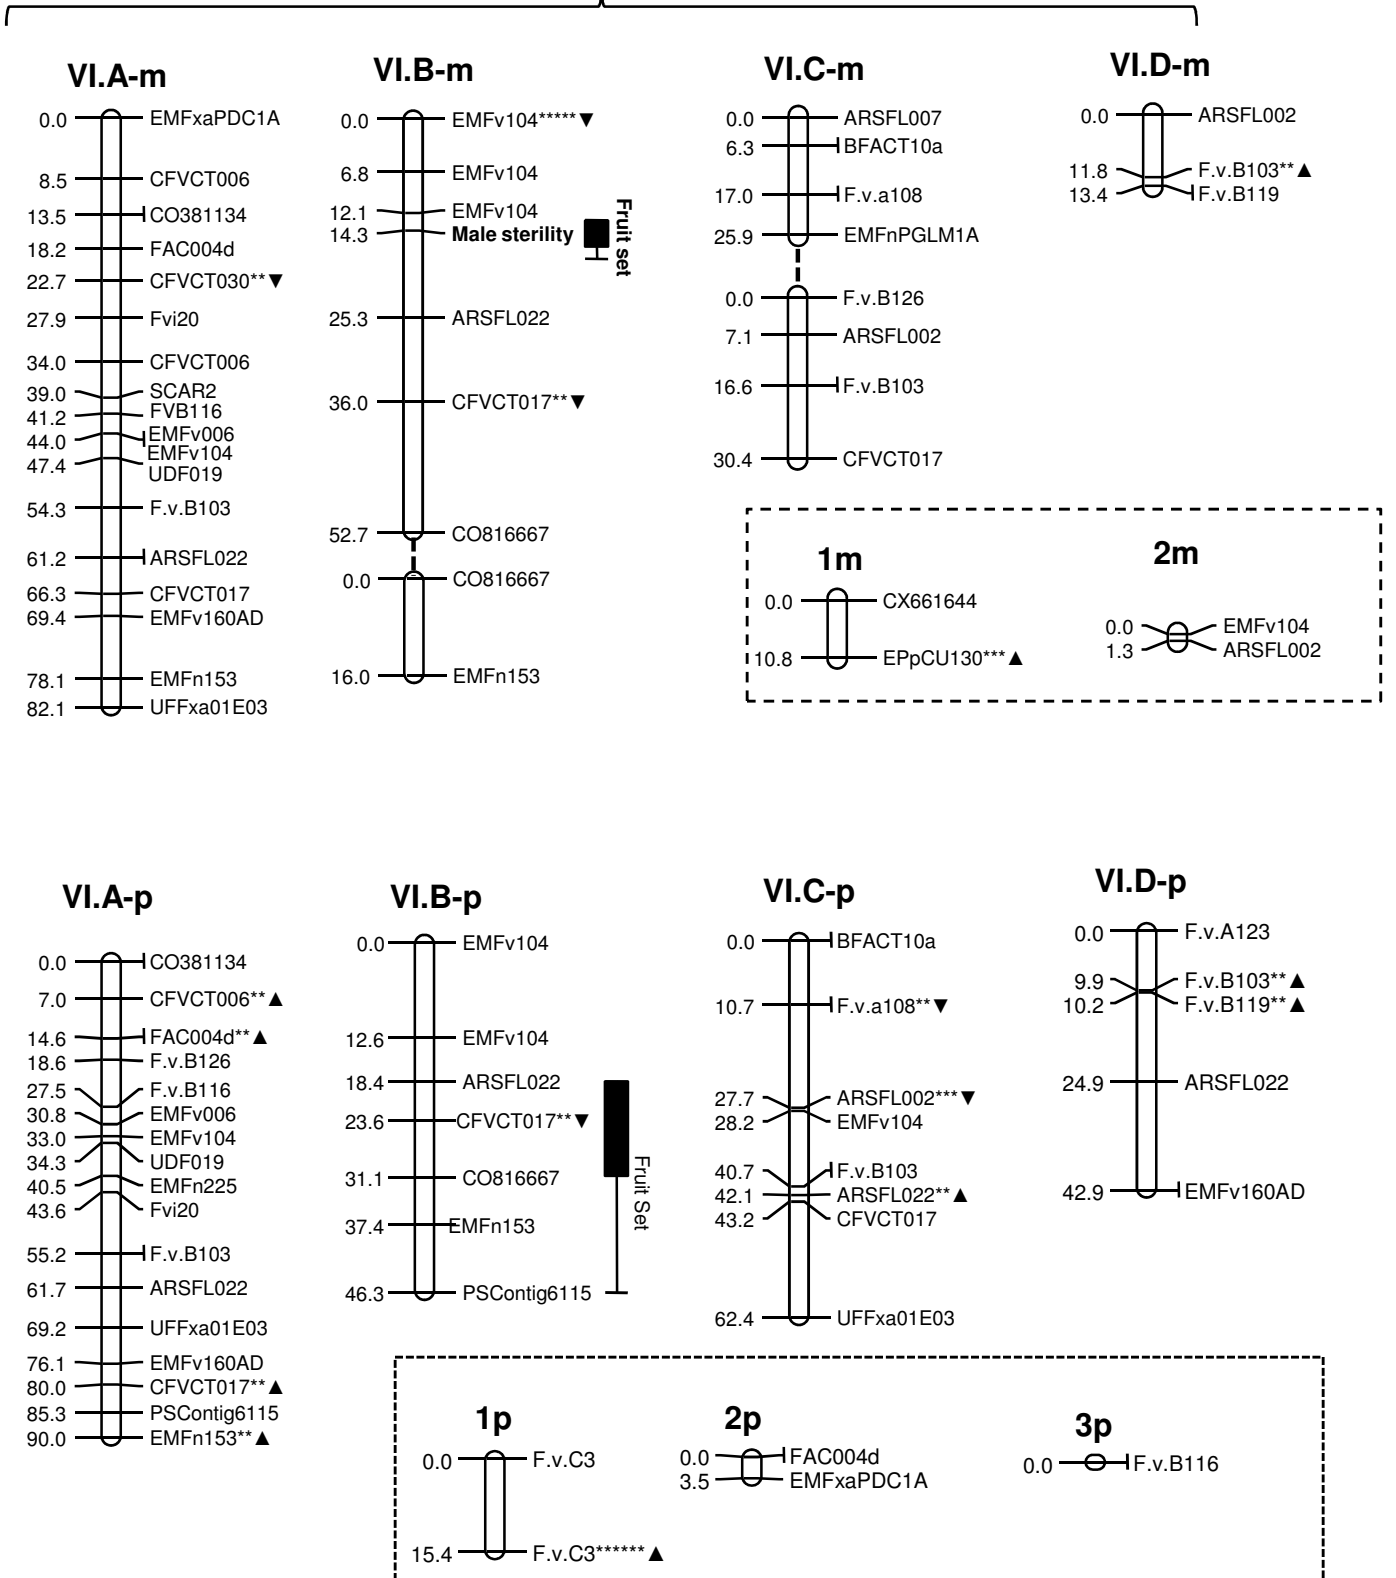

Supplementary Figure 2.

Supplement: hdy201296x1.pdf [file hdy201296x1.pdf]
